# Supplementary material for: A novel magnetic calcium silicate/graphene oxide composite material for selective adsorption of acridine orange from aqueous solutions
Source: Royal Society of Chemistry journal article supplement (doi:10.1039/c6ra07625d), 2016-01-01
Supplement: c6ra07625d1.pdf [file c6ra07625d1.pdf]

# **A novel magnetic calcium silicate/graphene oxide composite material for selective adsorption of acridine orange from aqueous solutions**

Huan Wang,<sup>a b</sup> Youning Chen,<sup>b</sup> Yinmao Wei<sup>a\*</sup>

<sup>a</sup> Key Laboratory of Synthetic and Natural Function Molecule Chemistry of Ministry of Education, College of Chemistry & Materials Science, Northwest University, Xi'an 710069, China. Email: ymwei@nwu.edu.cn  
Fax: +86-29-88302604; Tel.: +86-29-88302604

<sup>b</sup> College of Chemistry and Chemical Engineering, Xianyang Normal College, Xianyang 712000, China

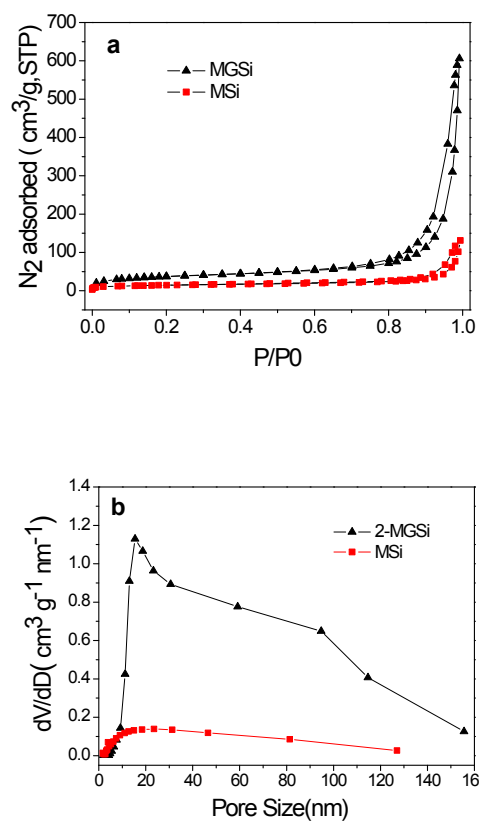

**Fig. S1** (a) Nitrogen adsorption–desorption isotherm and  
(b) BJH pore size distribution of MSi and 2-MGSi.

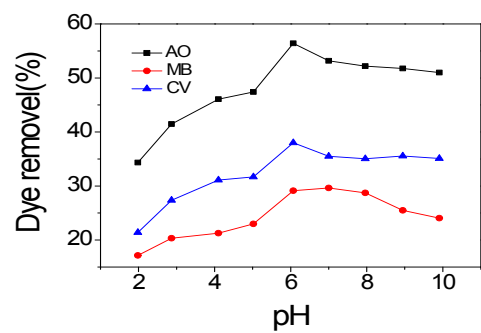

**Fig. S2** Effect of initial pH on the removal of AO, MB and CV onto MGSi in ternary systems

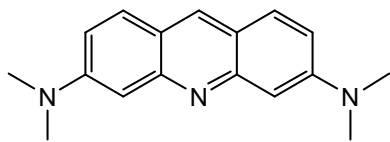

**acridine orange**

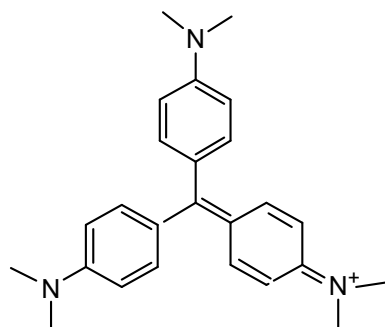

**crystal violet**

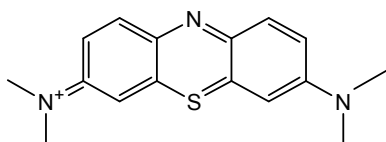

**methylene blue**

**Fig. S3** The chemical structure of acridine orange, methylene blue and crystal violet.

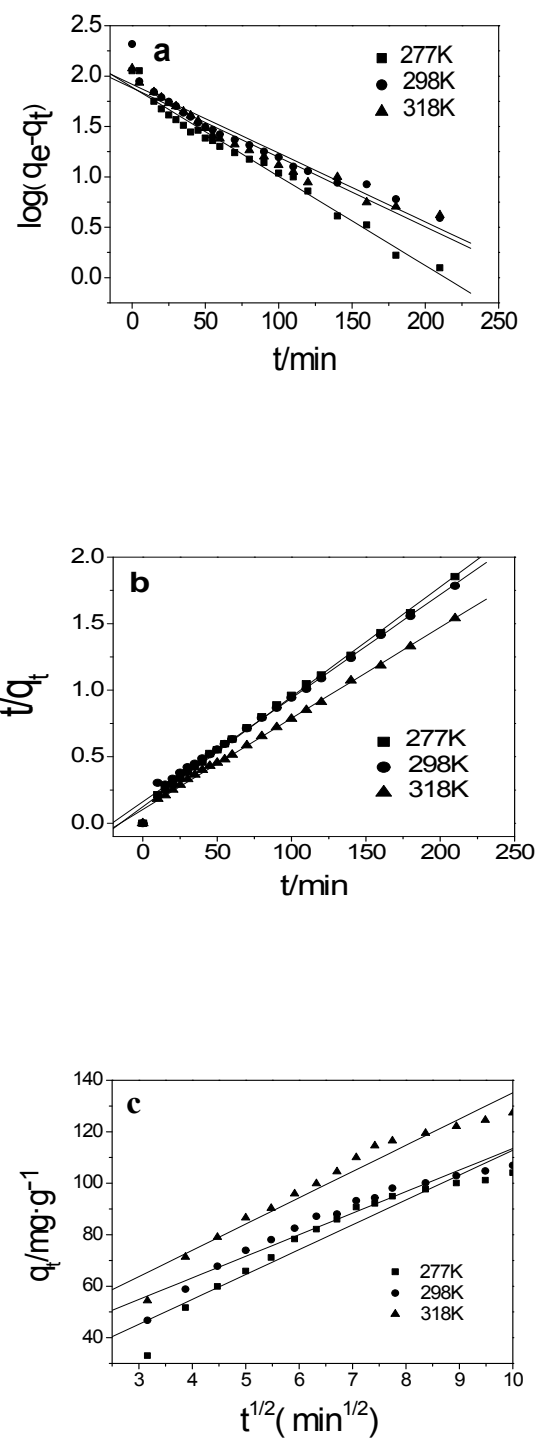

**Fig. S4** Kinetics model of AO on MGSi at 277K, 298K and 318K.

a: Pseudo-first-order kinetics model, **b**: Pseudo-second-order kinetics model, **c**: Intra-particle diffusion model

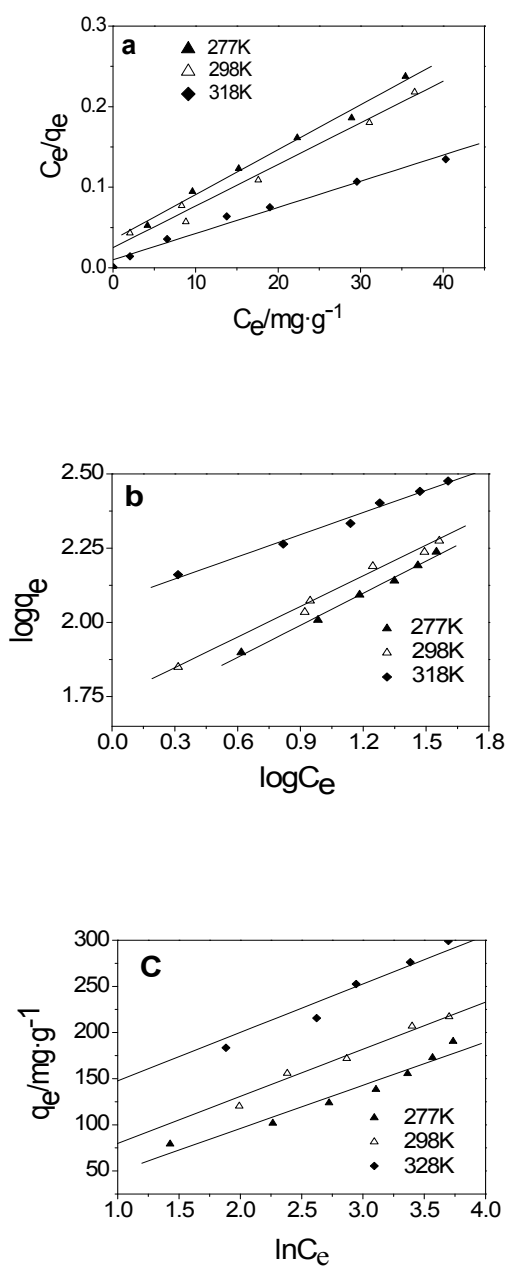

**Fig. S5** Isotherm models of AO on MGSi at 277K, 298K and 318K.

a: Langmuir model, b: Freundlich model, c: Temkin model
